# Supplementary material for: Achieving high energy storage density at low operating fields in lead hafnate-based novel perovskite solid solutions
Source: Royal Society of Chemistry journal article supplement (doi:10.1039/d4ta02493a), 2024-01-01
Supplement: d4ta02493a1.pdf [file d4ta02493a1.pdf]

*J. Mater. Chem A.*

**Supporting Information**

**Achieving Ultrahigh Energy Storage Density at Low Operating Fields in Lead  
Hafnate-Based Novel Perovskite Solid Solutions**

Vidhi Chauhan, Bi-Xia Wang, Alexei A. Bokov and Zuo-Guang Ye\*

Department of Chemistry and 4D LABS, Simon Fraser University, Burnaby, British Columbia, V5A 1S6, Canada

Figure S.1. (a-e) Room temperature variation of relative permittivity as a function of frequency of the  $(1-x)\text{PbHfO}_3\text{-}x\text{AgNbO}_3$  ceramics: (a)  $x = 0.01$ , (b)  $x = 0.02$ , (c)  $x = 0.025$ , (d)  $x = 0.027$  and (e)  $x = 0.03$ .

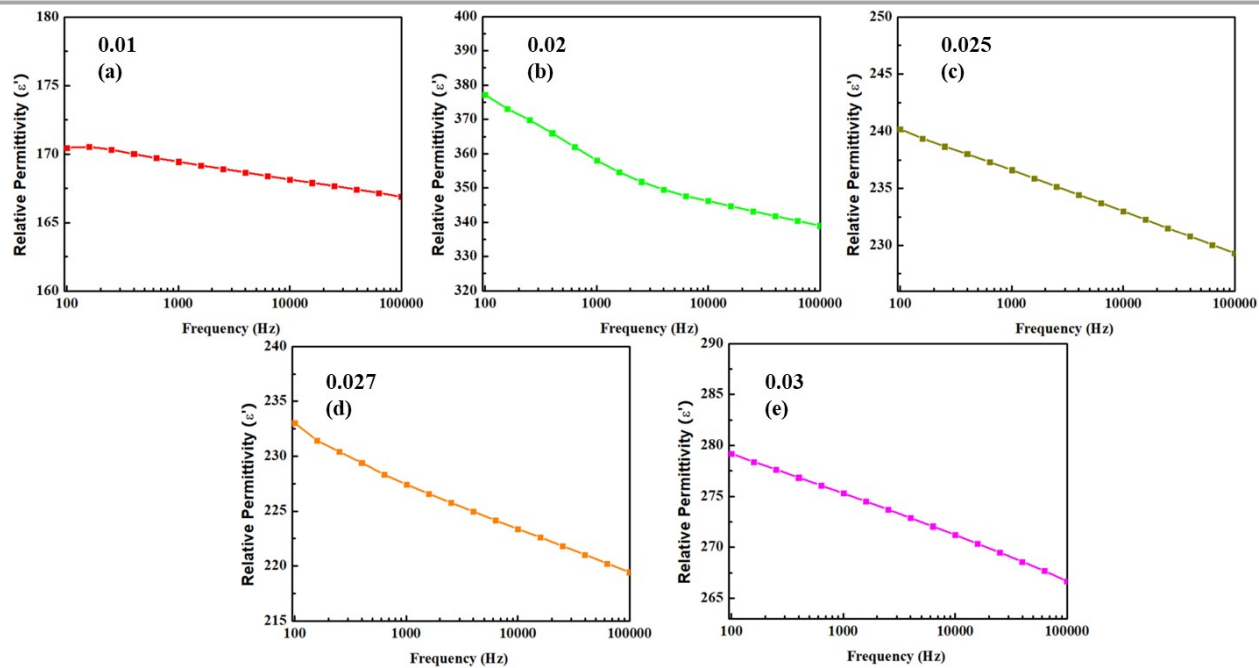

Figure S.2. (a-e) Temperature dependencies of loss tangent of the (1-x)PbHfO<sub>3</sub>-xAgNbO<sub>3</sub> ceramics measured at various frequencies : (a) x = 0.01, (b) x = 0.02, (c) x = 0.025, (d) x = 0.027 and (e) x = 0.03.

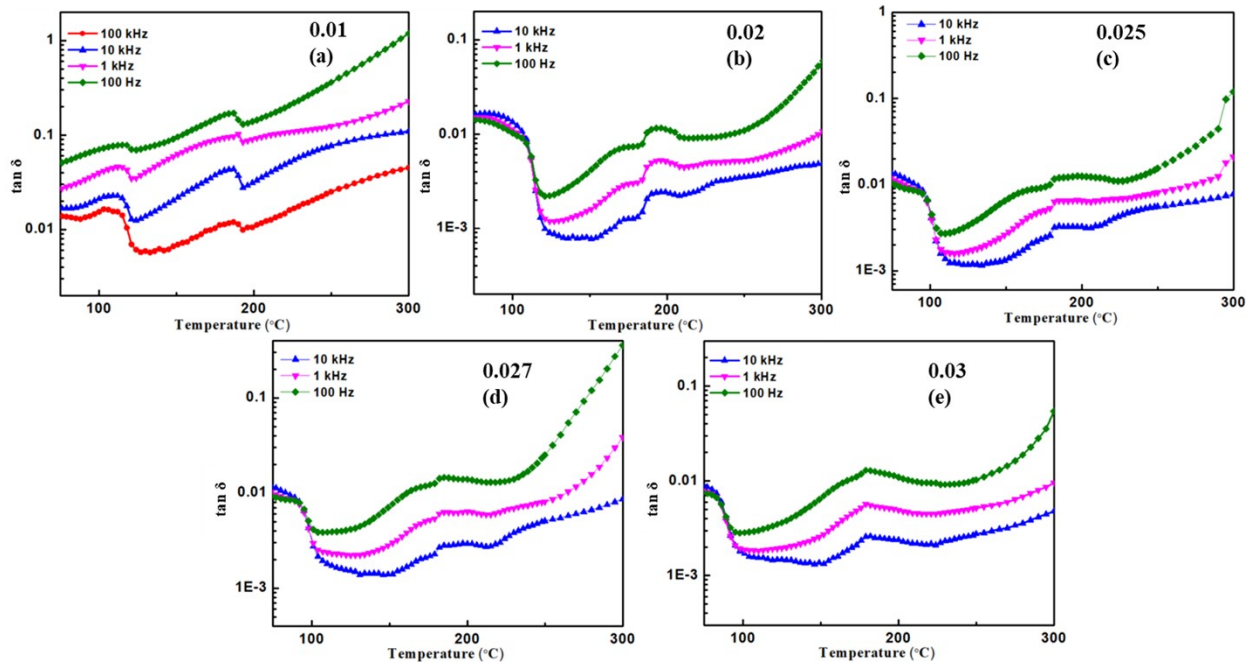

The temperature and frequency dependencies of loss tangent of the as-sintered (1-x)PbHfO<sub>3</sub>-xAgNbO<sub>3</sub> ceramics are presented in Figure S-2 in logarithmic scale. Two sharp anomalies are clearly visible in the loss tangent data, which represent  $T_{C1}$  and  $T_{C2}$ .



Figure S.3. (a-e) Variation of Imaginary part of permittivity ( $\epsilon''$ ) as a function of temperature for various compositions of the  $(1-x)\text{PbHfO}_3$ - $x\text{AgNbO}_3$  ceramics.

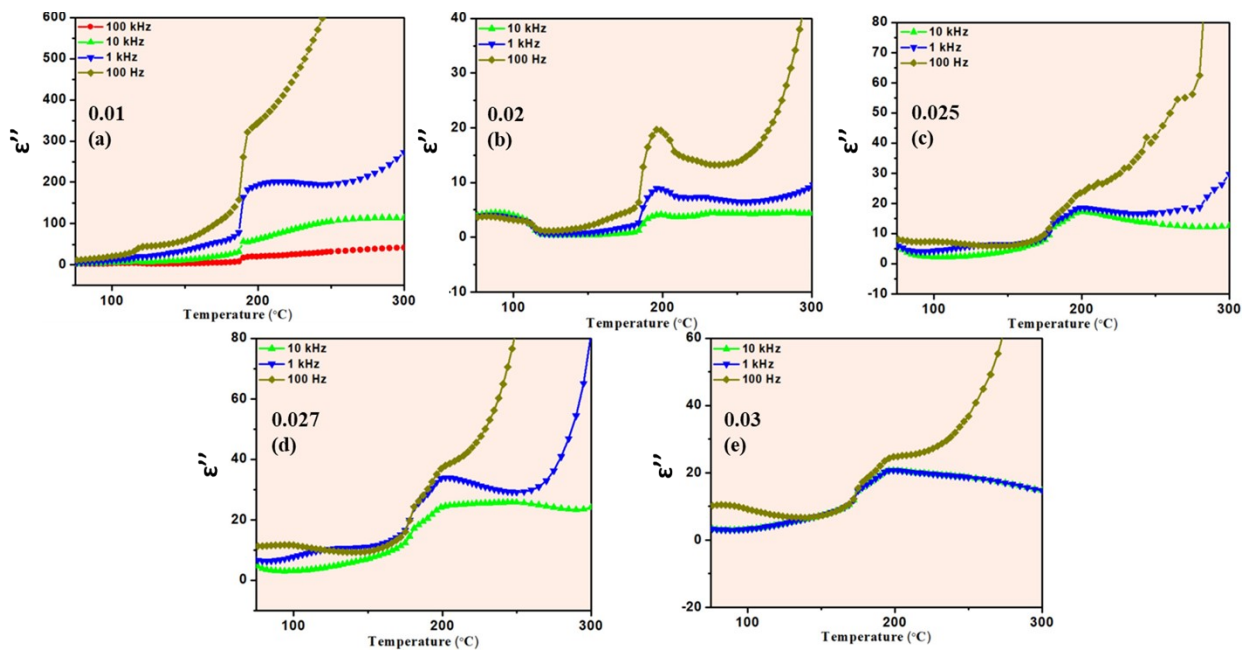

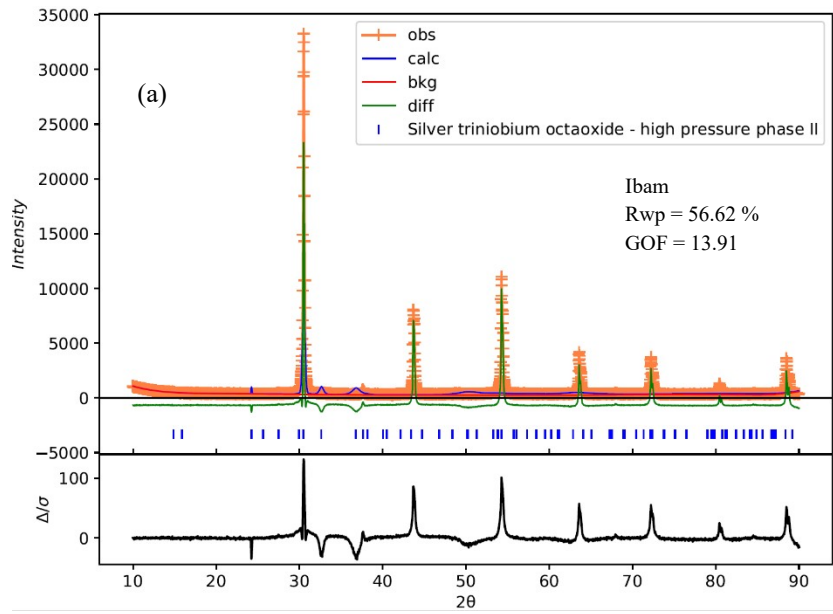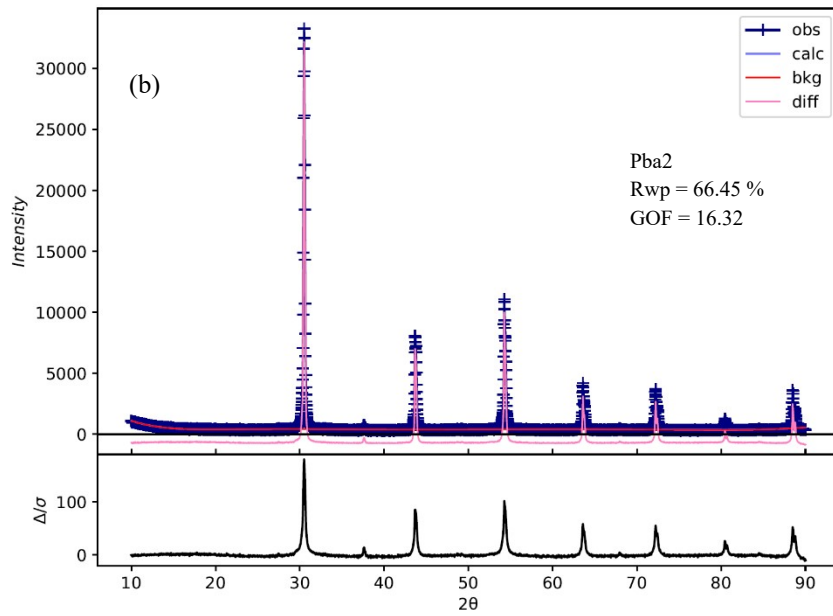

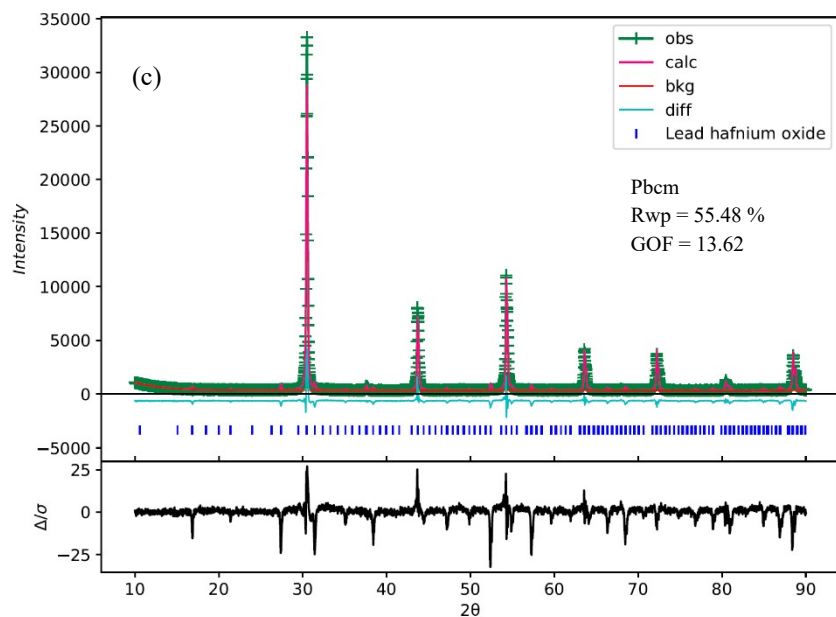

Figure S.4. (a-c) Rietveld refinement results of the  $0.973\text{PbHfO}_3\text{-}0.027\text{AgNbO}_3$  ceramics measured at 195 °C by using different structural models: (a) Ibam, (b) Pba2 and (c) Pbcm.

Table S.1 Refined structural parameters of  $0.973\text{PbHfO}_3\text{-}0.027\text{AgNbO}_3$  ceramics at different temperatures

| Temperatur<br>e | Space<br>group | Ions                 | Positional Coordinates |             |             | Cell Parameters<br>(Å) |
|-----------------|----------------|----------------------|------------------------|-------------|-------------|------------------------|
|                 |                |                      | X                      | Y           | Z           |                        |
| 25 °C           | Pbam           | Pb <sup>2+</sup> (1) | 0.7157                 | 0.1303      | 0.0000      | a = 5.8383 (1)         |
|                 |                | Pb <sup>2+</sup> (2) | 0.7136                 | 0.1247      | 0.5000      | b = 11.6901 (2)        |
|                 |                | Hf <sup>4+</sup>     | 0.2449                 | 0.1244      | 0.2512      | c = 8.1911 (1)         |
|                 |                | O <sup>2-</sup> (1)  | 0.2859                 | 0.0982      | 0.0000      |                        |
|                 |                | O <sup>2-</sup> (2)  | 0.2681                 | 0.1532      | 0.5000      |                        |
|                 |                | O <sup>2-</sup> (3)  | 0.0229                 | 0.2568      | 0.2222      |                        |
|                 |                | O <sup>2-</sup> (4)  | 0.0000                 | 0.5000      | 0.2880      |                        |
|                 |                | O <sup>2-</sup> (5)  | 0.0000                 | 0.0000      | 0.2692      |                        |
|                 |                | Ag <sup>1+</sup> (1) | 0.7157                 | 0.1303      | 0.0000      |                        |
|                 |                | Ag <sup>1+</sup> (2) | 0.7136                 | 0.1247      | 0.5000      |                        |
|                 |                | Nb <sup>5+</sup>     | 0.2449                 | 0.1244      | 0.2512      |                        |
| 105 °C          | Imma           | Pb <sup>2+</sup>     | 0.0120 (7)             | 0.0410 (4)  | 0.0330 (5)  | a = 5.8431 (3)         |
|                 |                | Hf <sup>4+</sup>     | 0.0220 (5)             | 0.008 (3)   | -0.0070 (4) | b = 8.2110 (2)         |
|                 |                | O <sup>2-</sup> (1)  | 0.610 (3)              | 0.2500 (8)  | -0.0200 (9) | c = 5.8379 (2)         |
|                 |                | O <sup>2-</sup> (2)  | -0.153 (3)             | 0.020 (1)   | 0.000 (3)   |                        |
|                 |                | Ag <sup>1+</sup>     | 0.0120 (7)             | 0.0410 (4)  | 0.0330 (5)  |                        |
|                 |                | Nb <sup>5+</sup>     | 0.0220 (5)             | 0.0088 (30) | -0.0070 (4) |                        |
| 175 °C          | Imma           | Pb <sup>2+</sup>     | 0.0100 (7)             | 0.0620 (3)  | 0.0220 (7)  | a = 5.8416 (2)         |
|                 |                | Hf <sup>4+</sup>     | 0.0250 (6)             | 0.003 (3)   | -0.0010 (5) | b = 8.2381 (2)         |
|                 |                | O <sup>2-</sup> (1)  | 0.01800                | 0.00900     | 0.00140     | c = 5.8362 (2)         |
|                 |                | O <sup>2-</sup> (2)  | 0.01800                | 0.03100     | 0.01000     |                        |
|                 |                | Ag <sup>1+</sup>     | 0.0100 (7)             | 0.0620 (3)  | 0.0220 (7)  |                        |
|                 |                | Nb <sup>5+</sup>     | 0.0250 (6)             | 0.003 (3)   | -0.0010 (5) |                        |

|               |      |                     |             |             |             |                |
|---------------|------|---------------------|-------------|-------------|-------------|----------------|
| <b>195 °C</b> | Imma | Pb <sup>2+</sup>    | 0.040 (1)   | 0.056 (1)   | 0.0150 (7)  | a = 5.8430 (5) |
|               |      | Hf <sup>4+</sup>    | 0.0230 (8)  | 0.0120 (9)  | -0.0030 (6) | b = 8.2522 (5) |
|               |      | O <sup>2-</sup> (1) | 0.0180      | 0.0090      | 0.0014      | c = 5.8366 (3) |
|               |      | O <sup>2-</sup> (2) | 0.0180      | 0.0310      | 0.0110      |                |
|               |      | Ag <sup>1+</sup>    | 0.0400 (10) | 0.0560 (10) | 0.0150 (7)  |                |
|               |      | Nb <sup>5+</sup>    | 0.0230 (8)  | 0.0120 (9)  | -0.0030 (6) |                |

|               |      |                     |             |             |            |                |
|---------------|------|---------------------|-------------|-------------|------------|----------------|
| <b>205 °C</b> | Imma | Pb <sup>2+</sup>    | 0.0168      | 0.0291      | 0.0201     | a = 5.8428 (4) |
|               |      | Hf <sup>4+</sup>    | 0.0140 (9)  | 0.013 (1)   | 0.0000 (7) | b = 8.2552 (7) |
|               |      | O <sup>2-</sup> (1) | -0.9500 (9) | 0.5300 (9)  | 0.5100 (9) | c = 5.8363 (4) |
|               |      | O <sup>2-</sup> (2) | -0.7700 (5) | -0.2200 (4) | 0.5600 (6) |                |
|               |      | Ag <sup>1+</sup>    | 0.0168      | 0.0291      | 0.0201     |                |
|               |      | Nb <sup>5+</sup>    | 0.0140 (9)  | 0.013 (1)   | 0.0000 (7) |                |
